# Supplementary material for: Where is Late Cenozoic climate change most likely to impact denudation?
Source: Copernicus journal article supplement (doi:10.5194/esurf-2017-47), 2017-08-16
Supplement: Supplementary file 1 [file esurf-2017-47-supplement.pdf]

# **Where is Late Cenozoic climate change most likely to impact denudation?**

Sebastian G. Mutz<sup>1</sup>, Todd A. Ehlers<sup>1</sup>, Martin Werner<sup>2</sup>, Gerrit Lohmann<sup>2</sup>, Christian Stepanek<sup>2</sup>,  
Jingmin Li<sup>3</sup>

<sup>1</sup> Department of Geosciences, University Tübingen, D-72074 Tübingen, Germany

<sup>2</sup> Department of Paleoclimate Dynamics, Alfred Wegener Institute, Helmholtz Centre for  
Polar and Marine Research, D-27570 Bremerhaven, Germany

<sup>3</sup> Institute for Geography and Geology, University of Würzburg, Würzburg, D-97074  
Germany

*Correspondence to:* Sebastian G. Mutz (sebastian.mutz@uni-tuebingen.de)

Supplementary material

This file contains four tables listing the mean values for different climate variables of a specific climate cluster and simulation. Furthermore, the file contains four figures showing the change of near-surface temperature amplitude and precipitation amplitude for the four investigated time slices and regions.

| Region         | Simulation | Cluster No.   | Value Count | Prec. (mm/a) | Prec. Amp. (mm) | T2m (°C) | T2m Amp (°C) | u10 Jan (m/s) | u10 Jul (m/s) | v10 Jan (m/s) | v10 Jul (m/s) |
|----------------|------------|---------------|-------------|--------------|-----------------|----------|--------------|---------------|---------------|---------------|---------------|
| Himalaya-Tibet | PI         | 1             | 100         | 4122.23      | 11701.66        | 18.28    | 9.87         | -2.36         | 3.36          | -2.14         | 1.13          |
|                |            | 2             | 600         | 1701.74      | 4016.79         | 20.36    | 9.34         | -1.07         | 1.8           | -1.13         | 0.78          |
|                |            | 3             | 1392        | 776.98       | 1781.33         | 16.42    | 19.72        | -0.21         | 0.21          | -0.7          | 0.61          |
|                |            | 4             | 2693        | 522.82       | 924.25          | -4.41    | 33.98        | 1.39          | 0.36          | 0.87          | 0.07          |
|                |            | 5             | 223         | 302.99       | 869.49          | 23.77    | 6.67         | -2.85         | 4.01          | -1.8          | 5.99          |
|                |            | 6             | 1549        | 235.03       | 468.58          | 8.63     | 28.04        | 0.01          | -0.54         | 0.21          | -1.46         |
|                |            | entire region | 6557        | 664.08       | 1444.04         | 6.66     | 26           | 0.29          | 0.42          | 0.06          | 0.11          |
|                | MH         | 1             | 73          | 4717.1       | 14001.63        | 9.46     | 16.41        | -1.07         | 0.89          | -1.89         | 0.23          |
|                |            | 2             | 829         | 1473.3       | 3442.89         | 19.43    | 11.46        | -0.88         | 1.15          | -1            | 0.7           |
|                |            | 3             | 216         | 1095.98      | 2583.73         | 24.18    | 5.23         | -3.37         | 4.27          | -3            | 4.62          |
|                |            | 4             | 1204        | 773.69       | 1752.51         | 13.17    | 25.47        | 0.04          | -0.25         | -0.6          | -0.09         |
|                |            | 5             | 3789        | 443.07       | 780.01          | -0.45    | 34.14        | 0.88          | 0             | 0.74          | -0.36         |
|                |            | 6             | 446         | 288.17       | 913.34          | 21.63    | 16.08        | -0.8          | 2.35          | -0.94         | 2.95          |
|                |            | entire region | 6557        | 692.59       | 1510.93         | 6.99     | 27.3         | 0.23          | 0.41          | 0.01          | 0.22          |
|                | LGM        | 1             | 14          | 6922.26      | 21694.21        | 4.82     | 17.3         | -0.17         | -0.09         | -1.9          | 0.21          |
|                |            | 2             | 44          | 3365.56      | 9494.76         | 3.3      | 19.44        | -0.24         | -0.05         | -1.41         | 0.24          |
|                |            | 3             | 1040        | 911.88       | 2436.24         | 17.69    | 12.55        | -0.86         | 1.05          | -0.74         | 0.79          |
|                |            | 4             | 402         | 381.77       | 1001.95         | 20.84    | 11.46        | -1.35         | 3.73          | -2.04         | 3.91          |
|                |            | 5             | 1482        | 307.5        | 784.28          | 10.74    | 24.64        | 0.07          | 0.18          | -0.68         | -0.84         |
|                |            | 6             | 3575        | 305.99       | 585.44          | -5.44    | 34.94        | 0.93          | 0.13          | 0.66          | -0.26         |
|                |            | entire region | 6557        | 441.74       | 1054.33         | 3.58     | 27.48        | 0.3           | 0.51          | -0.05         | 0.04          |
|                | PLIO       | 1             | 354         | 2582.5       | 5051.84         | 17.5     | 10.29        | 0             | 0.26          | -1.04         | 0.5           |
|                |            | 2             | 132         | 2294.38      | 4607.95         | 25.22    | 5            | -4.21         | 3.94          | -3.07         | 1.45          |
|                |            | 3             | 914         | 1026.89      | 2455.52         | 20.84    | 12.29        | -1.3          | 1.84          | -1.1          | 1.42          |
|                |            | 4             | 1173        | 884.13       | 2041.39         | 13.88    | 23.19        | 0.06          | 0.08          | -0.5          | 0.38          |
|                |            | 5             | 120         | 497.76       | 1300.27         | 26.01    | 5.43         | -4.68         | 5.6           | -2.17         | 6.9           |
|                |            | 6             | 3864        | 480.29       | 742.84          | 1.88     | 31.43        | 0.7           | 0.01          | 0.51          | -0.2          |
| entire region  |            | 6557          | 779.06      | 1534.52      | 8.42            | 25.14    | 0.07         | 0.47          | -0.1          | 0.33          |               |

Table 1. Mean values of the 8 climatic variables used in the cluster analysis for different regions (or clusters) in the Himalaya-Tibet area for different time slice experiments (PI, MH, LGM and PLIO). The variables included are precipitation (prec.), seasonal precipitation amplitude (prec. amp.), near-surface temperature (T2m), seasonal near-surface temperature amplitude (T2m amp.), u-wind speeds in January (u10 Jan) and July (u10 Jul) and v-wind speeds in January (v10 Jan) and July (v10 Jul) at the 10m level.

| Region        | Simulation | Cluster No.   | Value Count | Prec. (mm/a) | Prec. Amp. (mm) | T2m (°C) | T2m Amp (°C) | u10 Jan (m/s) | u10 Jul (m/s) | v10 Jan (m/s) | v10 Jul (m/s) |
|---------------|------------|---------------|-------------|--------------|-----------------|----------|--------------|---------------|---------------|---------------|---------------|
| S. America    | PI         | 1             | 58          | 3976.5       | 3437.28         | 6.25     | 7.6          | 2.39          | 0.74          | -0.76         | -1.88         |
|               |            | 2             | 363         | 2379.04      | 3598.04         | 22.4     | 3.98         | -0.15         | -0.39         | -0.44         | 0.27          |
|               |            | 3             | 135         | 1093.49      | 2833.74         | 8.15     | 7.01         | 0.53          | 0.33          | 0.66          | -0.45         |
|               |            | 4             | 265         | 844.38       | 1229.95         | 18.48    | 13.6         | -1.49         | -0.77         | -0.24         | -0.27         |
|               |            | 5             | 220         | 499.88       | 623.37          | 7.95     | 14.19        | 2.43          | 1.84          | 0.08          | -1.38         |
|               |            | 6             | 46          | 317.19       | 946.83          | 17.24    | 4.29         | 0.64          | -0.72         | 2.57          | 1.63          |
|               |            | entire region | 1087        | 1462.91      | 2202.98         | 15.67    | 8.97         | 0.3           | 0.1           | -0.04         | -0.34         |
|               | MH         | 1             | 62          | 4031.94      | 3604.58         | 6.47     | 8.69         | 2.43          | 1.11          | -0.74         | -1.86         |
|               |            | 2             | 344         | 2334.99      | 3572.15         | 22.71    | 5.55         | -0.14         | -0.47         | -0.38         | 0.11          |
|               |            | 3             | 149         | 1024.5       | 2470.25         | 8.34     | 7.29         | 0.38          | 0.34          | 0.6           | -0.49         |
|               |            | 4             | 263         | 732.19       | 1196.44         | 19.9     | 13           | -1.33         | -0.73         | -0.21         | -0.18         |
|               |            | 5             | 228         | 502.9        | 643.49          | 8.39     | 14.71        | 1.88          | 2.12          | -0.09         | -1.46         |
|               |            | 6             | 41          | 265.31       | 869.26          | 17.81    | 3.92         | 0.44          | -0.81         | 2.51          | 1.87          |
|               |            | entire region | 1087        | 1402         | 2131.91         | 15.95    | 9.63         | 0.24          | 0.2           | -0.06         | -0.42         |
|               | LGM        | 1             | 45          | 4034.24      | 2858.74         | -1.08    | 6.12         | 1.92          | 2.74          | -2.13         | -3.22         |
|               |            | 2             | 95          | 3451.79      | 4708.19         | 10.32    | 6.71         | 0.47          | 0.02          | -0.07         | -0.95         |
|               |            | 3             | 313         | 1755.47      | 2670.71         | 22.53    | 3.83         | -0.29         | -0.52         | -0.32         | 0.65          |
|               |            | 4             | 250         | 945.38       | 1130.22         | 17.93    | 14.03        | -1.75         | -0.92         | -1.08         | -0.95         |
|               |            | 5             | 189         | 742.38       | 1463.71         | 7.44     | 7.61         | 0.42          | 0.15          | 0.55          | -0.22         |
|               |            | 6             | 195         | 463.04       | 539.63          | 7.11     | 18.05        | 2.01          | 2.4           | 0.06          | -1.33         |
|               |            | entire region | 1087        | 1403.74      | 1910.1          | 14.04    | 9.73         | 0.07          | 0.21          | -0.33         | -0.53         |
|               | PLIO       | 1             | 69          | 2697.5       | 2562.31         | 9.18     | 8.83         | 2.57          | 1.01          | -0.21         | -1.36         |
|               |            | 2             | 314         | 2256.95      | 3678.91         | 23.38    | 4.7          | -0.1          | -0.7          | -0.42         | 0.44          |
|               |            | 3             | 265         | 1199.2       | 2666.04         | 17.43    | 6.34         | -0.17         | -0.35         | 0.1           | -0.15         |
| 4             |            | 34            | 943.79      | 2058.04      | 15.82           | 7.07     | 2.9          | 1.08          | 3.72          | -0.76         |               |
| 5             |            | 183           | 699.51      | 899.56       | 18.11           | 14.03    | -1.42        | -0.4          | -0.14         | -0.55         |               |
| 6             |            | 222           | 558.38      | 760.44       | 10.67           | 13.66    | 1.39         | 1.48          | -0.04         | -1.01         |               |
| entire region |            | 1087          | 1376.87     | 2246.45      | 17.31           | 8.84     | 0.23         | 0.05          | -0.03         | -0.32         |               |

Table 2. Mean values of the 8 climatic variables used in the cluster analysis for different regions (or clusters) in western South America for different time slice experiments (PI, MH, LGM and PLIO). The variables included are precipitation (prec.), seasonal precipitation amplitude (prec. amp.), near-surface temperature (T2m), seasonal near-surface temperature amplitude (T2m amp.), u-wind speeds in January (u10 Jan) and July (u10 Jul) and v-wind speeds in January (v10 Jan) and July (v10 Jul) at the 10m level.

| Region | Simulation | Cluster No.   | Value Count | Prec. (mm/a) | Prec. Amp. (mm) | T2m (°C) | T2m Amp (°C) | u10 Jan (m/s) | u10 Jul (m/s) | v10 Jan (m/s) | v10 Jul (m/s) |
|--------|------------|---------------|-------------|--------------|-----------------|----------|--------------|---------------|---------------|---------------|---------------|
| Alaska | PI         | 1             | 78          | 2880.46      | 2789.59         | 1.67     | 15.97        | -             | -             | -             | -             |
|        |            | 2             | 141         | 1420.14      | 1027.77         | 0.02     | 21.22        | -             | -             | -             | -             |
|        |            | 3             | 212         | 799.12       | 797.69          | -2.97    | 30.44        | -             | -             | -             | -             |
|        |            | 4             | 376         | 512.21       | 569.6           | -5.34    | 39.19        | -             | -             | -             | -             |
|        |            | entire region | 807         | 975.12       | 924.14          | -3.1     | 31.51        | -             | -             | -             | -             |
|        | MH         | 1             | 30          | 3247.58      | 4077.15         | 3.31     | 18.83        | -             | -             | -             | -             |
|        |            | 2             | 54          | 2636.91      | 2837.84         | 0.85     | 18.07        | -             | -             | -             | -             |
|        |            | 3             | 248         | 1179.93      | 1066.33         | -0.75    | 24.63        | -             | -             | -             | -             |
|        |            | 4             | 475         | 608.54       | 821.11          | -4.78    | 36.74        | -             | -             | -             | -             |
|        |            | entire region | 807         | 1017.97      | 1152.46         | -2.86    | 31.1         | -             | -             | -             | -             |
|        | LGM        | 1             | 17          | 4884.93      | 5494.86         | -3.02    | 9.22         | -             | -             | -             | -             |
|        |            | 2             | 65          | 3282.43      | 3401.86         | -4.71    | 10.99        | -             | -             | -             | -             |
|        |            | 3             | 244         | 964.88       | 1010.36         | -9.23    | 16.69        | -             | -             | -             | -             |
|        |            | 4             | 481         | 346.52       | 561.38          | -8.67    | 28.01        | -             | -             | -             | -             |
|        |            | entire region | 807         | 865.56       | 1029.84         | -8.4     | 22.82        | -             | -             | -             | -             |
|        | PLIO       | 1             | 70          | 2748.21      | 2760.84         | 4.3      | 18.49        | -             | -             | -             | -             |
|        |            | 2             | 195         | 1418.28      | 936.08          | 1.51     | 18.19        | -             | -             | -             | -             |
|        |            | 3             | 244         | 896.64       | 808.9           | -0.53    | 28.33        | -             | -             | -             | -             |
|        |            | 4             | 298         | 615.39       | 656.84          | -2.45    | 35.07        | -             | -             | -             | -             |
|        |            | entire region | 807         | 1079.44      | 952.79          | -0.33    | 27.52        | -             | -             | -             | -             |

Table 3. Mean values of the 4 climatic variables used in the cluster analysis for different regions (or clusters) in South Alaska for different time slice experiments (PI, MH, LGM and PLIO). The variables included are precipitation (prec.), seasonal precipitation amplitude (prec. amp.), near-surface temperature (T2m) and seasonal near-surface temperature amplitude (T2m amp.).

| Region   | Simulation | Cluster No.   | Value Count | Prec.<br>(mm/a) | Prec. Amp.<br>(mm) | T2m<br>(°C) | T2m Amp<br>(°C) | u10 Jan<br>(m/s) | u10 Jul<br>(m/s) | v10 Jan<br>(m/s) | v10 Jul<br>(m/s) |
|----------|------------|---------------|-------------|-----------------|--------------------|-------------|-----------------|------------------|------------------|------------------|------------------|
| Cascades | PI         | 1             | 4           | 2504.53         | 3374.14            | 0.9         | 6.93            | -                | -                | -                | -                |
|          |            | 2             | 41          | 2282.57         | 3492.09            | 9.31        | 17.94           | -                | -                | -                | -                |
|          |            | 3             | 18          | 1868.96         | 2096.67            | 4.91        | 21.47           | -                | -                | -                | -                |
|          |            | 4             | 29          | 720.41          | 682.31             | 6.28        | 23.45           | -                | -                | -                | -                |
|          |            | entire region | 92          | 1718.88         | 2328.25            | 7.13        | 19.89           | -                | -                | -                | -                |
|          | MH         | 1             | 24          | 2733.68         | 4539.25            | 7.09        | 20.87           | -                | -                | -                | -                |
|          |            | 2             | 2           | 2009.13         | 3838.17            | 0.44        | 3.71            | -                | -                | -                | -                |
|          |            | 3             | 34          | 1805.62         | 3213.77            | 9.65        | 23.87           | -                | -                | -                | -                |
|          |            | 4             | 32          | 771.29          | 938.45             | 6.58        | 27.4            | -                | -                | -                | -                |
|          |            | entire region | 92          | 1692.38         | 2781.7             | 7.71        | 23.88           | -                | -                | -                | -                |
|          | LGM        | 1             | 1           | 4573.17         | 6726.93            | -1.39       | 7.24            | -                | -                | -                | -                |
|          |            | 2             | 37          | 2895.44         | 3707.11            | -0.68       | 9.15            | -                | -                | -                | -                |
|          |            | 3             | 34          | 1717.84         | 1892.08            | -4.26       | 13.5            | -                | -                | -                | -                |
|          |            | 4             | 20          | 628.35          | 548.6              | -11.87      | 19.01           | -                | -                | -                | -                |
|          |            | entire region | 92          | 1985.63         | 2382.53            | -4.44       | 12.88           | -                | -                | -                | -                |
|          | PLIO       | 1             | 5           | 2520.15         | 3662.63            | 1.42        | 9.1             | -                | -                | -                | -                |
|          |            | 2             | 36          | 2201.2          | 3554.73            | 11.5        | 19.39           | -                | -                | -                | -                |
|          |            | 3             | 21          | 1699.61         | 2322.06            | 8.73        | 23.23           | -                | -                | -                | -                |
|          |            | 4             | 30          | 1044.79         | 1068.29            | 7.53        | 25.13           | -                | -                | -                | -                |
|          |            | entire region | 92          | 1726.95         | 2468.43            | 9.02        | 21.58           | -                | -                | -                | -                |

Table 4. Mean values of the 4 climatic variables used in the cluster analysis for different regions (or clusters) in the US Pacific Northwest for different time slice experiments (PI, MH, LGM and PLIO). The variables included are precipitation (prec.), seasonal precipitation amplitude (prec. amp.), near-surface temperature (T2m) and seasonal near-surface temperature amplitude (T2m amp).
